# Supplementary material for: A Proactive Behavioral Health Service Model to Address Use of Constant Observation in a General Hospital
Source: Atypon-hosted journal article supplement (doi:10.1176/appi.ps.201700456), 2018-01-16
Supplement: appi.ps.201700456.ds001.pdf [file appi.ps.201700456.ds001.pdf]

These non-pharmacologic interventions maximize patients' safety, stimulation, and support, minimizing the need for pharmacologic intervention, and reducing factors which often lead to the continuation of CO.

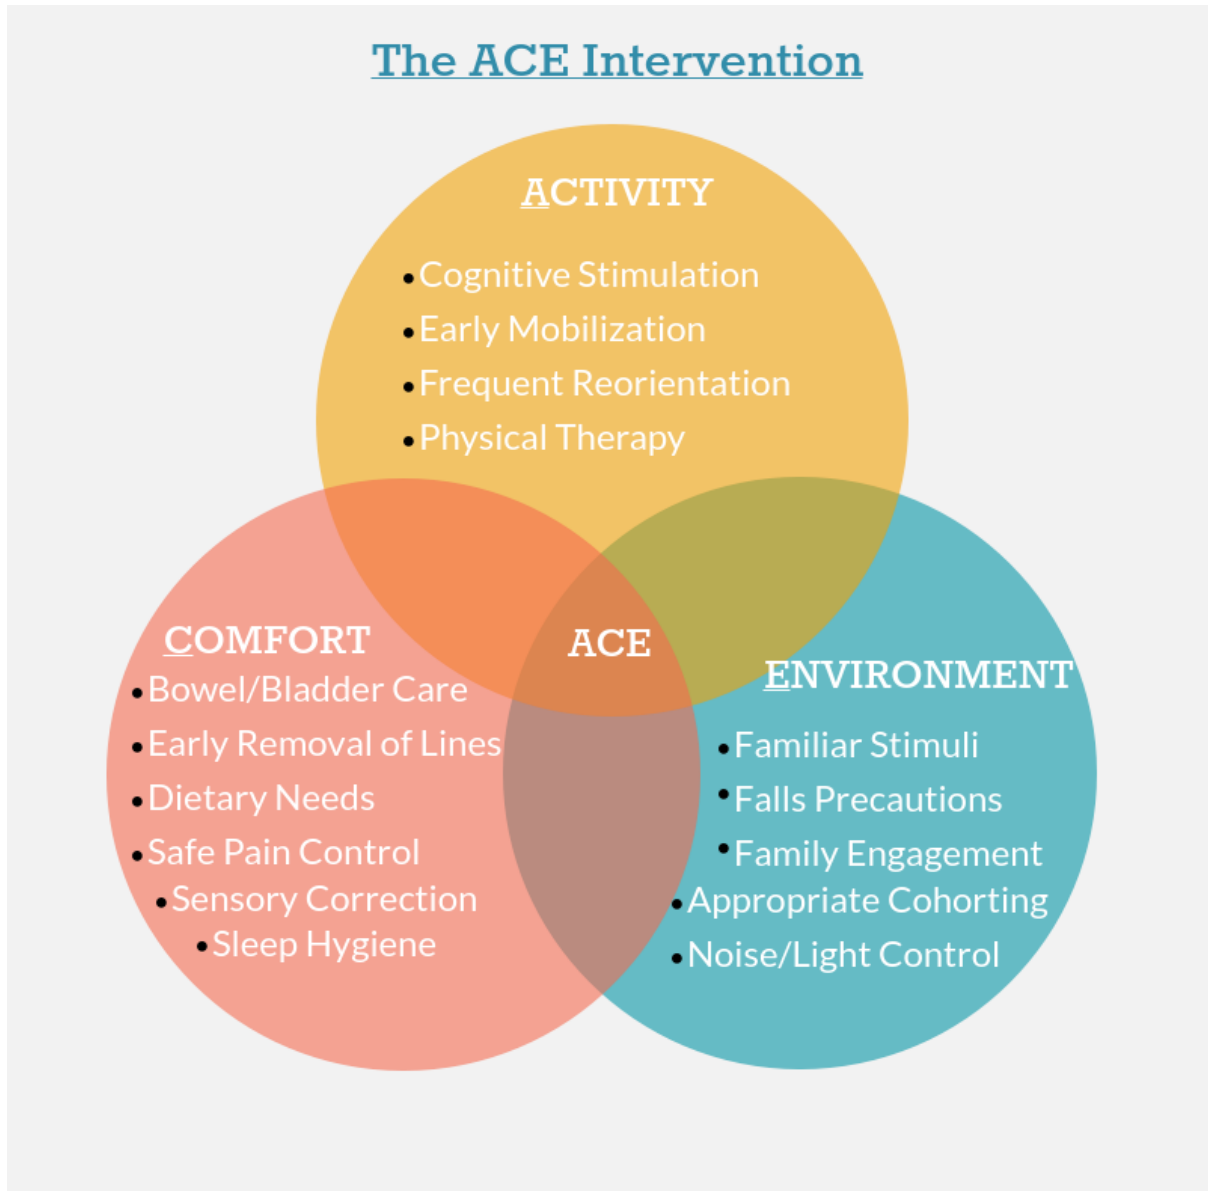

Table for Supplement with Legend:

**Table 1: Low Dose Antipsychotic Administration Schedule**

| <b>Generic Name</b> | <b>Usual Dose Range (mg/day)</b> | <b>Route</b> | <b>Extrapyramidal symptoms</b> | <b>QTc prolongation</b>  | <b>Orthostatic Hypotension</b> |
|---------------------|----------------------------------|--------------|--------------------------------|--------------------------|--------------------------------|
| Haloperidol         | 0.25-4                           | PO/IM/IV     | +++                            | ++<br>(more with IV use) | +                              |
| Quetiapine          | 12.5-100                         | PO           | +/-                            | +++                      | +++                            |
| Risperidone         | 0.125-2                          | PO, ODT      | ++                             | +                        | ++                             |

Low dose antipsychotics were utilized only when nonpharmacologic measures were ineffective for agitation and/or psychosis. Please note that the FDA has issued a black box warning on the use of antipsychotics in elderly patients with dementia (US Food and Drug Administration: Information for Healthcare Professionals: Conventional Antipsychotics.

<https://www.fda.gov/Drugs/DrugSafety/ucm124830.htm> Published June 16, 2008. Accessed Aug 6, 2017)
